# Supplementary material
Source: PubMed Central journal article supplement (PMC2268769)
Supplement: pnas_0710657105_6.pdf [file pnas_0710657105_6.pdf]

**Table 1. Data collection and refinement statistics**

| <b>Data collection</b>           | <b>Native</b>          | <b>Derivative</b>  |
|----------------------------------|------------------------|--------------------|
| Wavelength, Å                    | 0.9123                 | 1.5418             |
| Space group                      | P6 <sub>4</sub> 22     | P6 <sub>4</sub> 22 |
| Cell dimensions, Å               | <i>a</i> = 100.946     | <i>a</i> = 101.002 |
|                                  | <i>b</i> = 100.946     | <i>b</i> = 101.002 |
|                                  | <i>c</i> = 173.864     | <i>c</i> = 174.483 |
| Resolution limits, Å             | 61.66–1.65             | 30.92–1.83         |
| No. of reflections               | 582,856                | 715,148            |
| No. of unique reflections        | 58,965                 | 46,388             |
| Completeness, %                  | 93.0 (66.9)            | 98.5 (89.9)        |
| Redundancy                       | 9.9 (6.2)              | 15.4 (7.2)         |
| $\langle I/\sigma(I) \rangle$    | 28.1 (5.8)             | 24.4 (4.7)         |
| $R_{\text{merge}}$ (%)           | 0.055 (0.323)          | 0.095 (0.338)      |
| $R_{\text{meas}}$ (%)            | 0.058 (0.353)          | 0.098 (0.364)      |
| <b>Refinement</b>                |                        |                    |
| Resolution range, Å              | 20.00–1.65 (1.69-1.65) |                    |
| Completeness (working + test), % | 92.76 (62.83)          |                    |
| No. of reflections ( $F > 0$ )   | 55,887 (2,737)         |                    |
| Wilson B, Å <sup>2</sup>         | 23.5                   |                    |
| $R_{\text{cryst}}$ , %           | 15.58 (15.60)          |                    |
| $R_{\text{free}}$ , %            | 17.83 (20.70)          |                    |
| No. of non-hydrogen atoms        | 3,725                  |                    |
| Protein                          | 3,119                  |                    |
| Water                            | 497                    |                    |
| Sulfate                          | 40                     |                    |
| Glycerol                         | 48                     |                    |
| CL                               | 3                      |                    |
| 1,3-butanediol                   | 30                     |                    |
| TRIS                             | 8                      |                    |
| rmsd from ideality               |                        |                    |
| Bond lengths, Å                  | 0.014                  |                    |

| <b>Data collection</b>                 | <b>Native</b> | <b>Derivative</b> |
|----------------------------------------|---------------|-------------------|
| Bond angles, °                         | 1.373         |                   |
| Dihedrals, °                           | 17.3          |                   |
| Improper, °                            | 0.33          |                   |
| <b>Average B-factor, Å<sup>2</sup></b> | 45.82         |                   |
| Protein atoms                          | 46.99         |                   |
| Main chain                             | 45.83         |                   |
| Water                                  | 39.71         |                   |
| Glycerol                               | 40.52         |                   |
| SO <sub>4</sub> <sup>2-</sup>          | 41.42         |                   |
| CL                                     | 68.70         |                   |
| 1,3-butanediol                         | 39.93         |                   |
| TRIS                                   | 32.22         |                   |

$$R_{\text{merge}} = \sum |I - \langle I \rangle| / \sum \langle I \rangle.$$

Values in parentheses correspond to the highest resolution shell for data scaling (1.74–1.65 Å) and refinement (1.69–1.65 Å), respectively. For the derivative dataset, the highest resolution limit is 1.93 – 1.83 Å.

$$R_{\text{cryst}} = \sum |F_{\text{obs}}| - |F_{\text{calc}}| / \sum |F_{\text{obs}}|.$$

$R_{\text{free}}$  is calculated as for  $R_{\text{cryst}}$  but for a test set comprising reflections not used in the refinement (5.1%).
