# Supplementary material
Source: PubMed Central journal article supplement (PMC2268769)
Supplement: pnas_0710657105_7.pdf [file pnas_0710657105_7.pdf]

**Table 2a. Identified peptides of the larger limited proteolysis fragment of tANK ( $\approx 18.5$  kDa)**

| Fragment no. | Observed mass, daltons* | Calculated mass, daltons | Peptide sequence     | Sequence position |
|--------------|-------------------------|--------------------------|----------------------|-------------------|
| 1            | 1,087.5281              | 1,086.4842               | R.NYRDSYNR.T         | 26-33             |
| 2            | 1,402.7586              | 1,401.7504               | K.DIEGSTALIWAVK.N    | 62-74             |
| 3            | 1,253.5830              | 1,252.6048               | K.GSNVBTKDFSGK.T     | 88-99             |
| 4            | 1,370.7948              | 1,369.7453               | R.NLEGETPLIVASK.Y    | 128-140           |
| 5            | 1,746.9964              | 1,745.9312               | R.NLEGETPLIVASKYGR.S | 128-143           |
| 6            | 951.5327                | 950.5185                 | K.YGRSEIVK.K         | 141-148           |
| 7            | 1,285.7499              | 1,284.7401               | K.KLLELGADISAR.D     | 149-160           |
| 8            | 1,157.6640              | 1,156.6452               | K.LLELGADISAR.D      | 150-160           |
| 9            | 1,089.6127              | 1,088.6342               | R.IFGRQEVIK.I        | 173-181           |

**Table 2b. Identified peptides of the small limited proteolysis fragment of tANK ( $\approx 10$  kDa)**

| Fragment no. | Observed mass, daltons* | Calculated mass, daltons | Peptide sequence            | Sequence position |
|--------------|-------------------------|--------------------------|-----------------------------|-------------------|
| 1            | 1,370.8069              | 1,369.7453               | R.NLEGETPLIVASK.Y           | 128-140           |
| 2            | 1,747.0270              | 1,745.9312               | R.NLEGETPLIVASKYGR.S        | 128-143           |
| 3            | 1,285.8013              | 1,284.7401               | K.KLLELGADISAR.D            | 149-160           |
| 4            | 1,157.6884              | 1,156.6452               | K.LLELGADISAR.D             | 150-160           |
| 5            | 2,343.3569              | 2,342.2441               | K.LLELGADISARDLTGLTAEASAR.I | 150-172           |
| 6            | 1,204.6607              | 1,203.6095               | R.DLTGLTAEASAR.I            | 161-172           |
| 7            | 1,089.6727              | 1,088.6342               | R.IFGRQEVIK.I               | 173-181           |
| 8            | 920.5358                | 919.5239                 | K.IFTEVRR.A                 | 182-188           |

\*During ionization, the peptides get (in case of MALDI) singly protonated. Therefore, the masses get shifted by 1 Da,  $[M+H]^+$ .
