# Supplementary material
Source: PubMed Central journal article supplement (PMC2268769)

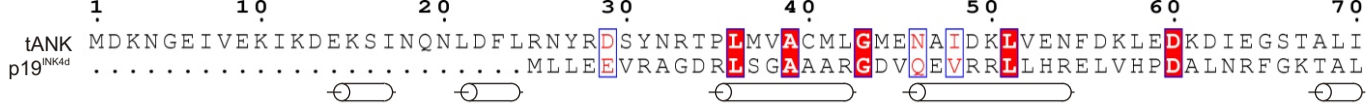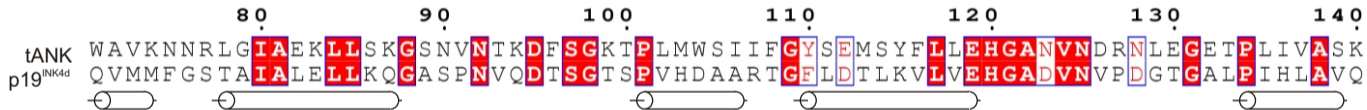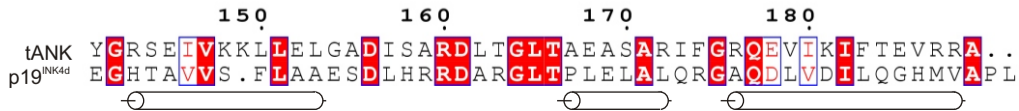

Supplement: pnas_0710657105_1.pdf [file pnas_0710657105_1.pdf]

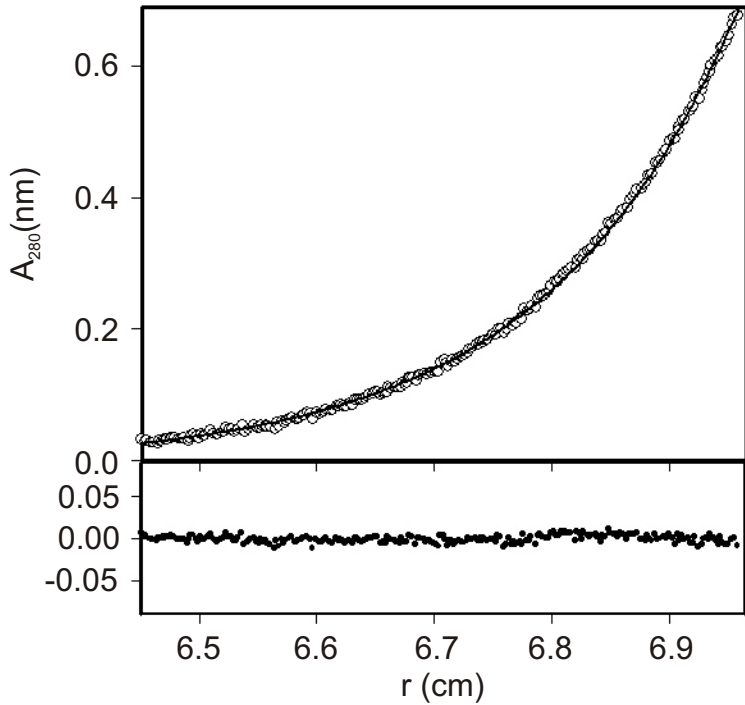

Supplement: pnas_0710657105_2.pdf [file pnas_0710657105_2.pdf]

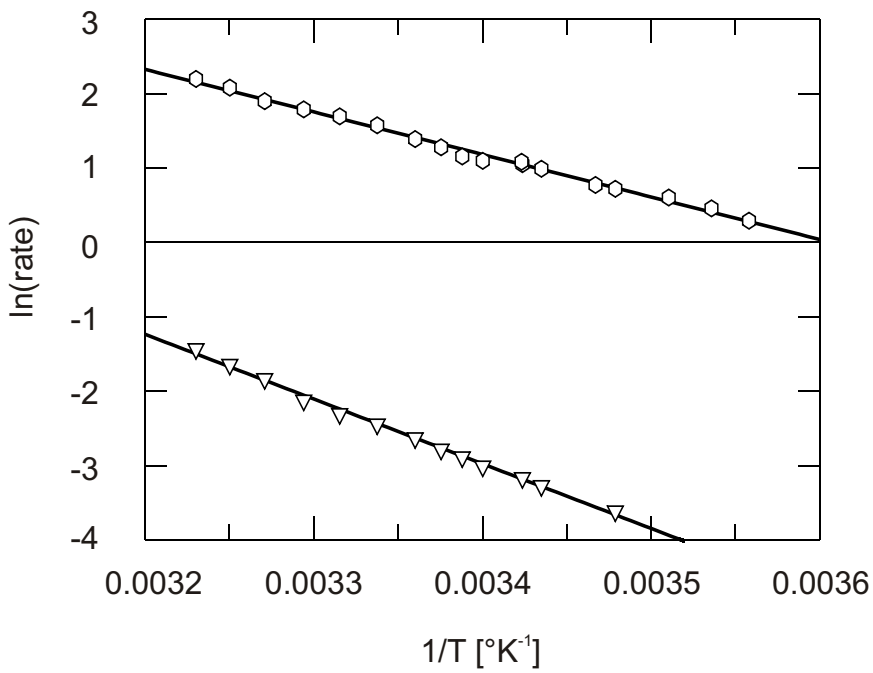

Supplement: pnas_0710657105_4.pdf [file pnas_0710657105_4.pdf]

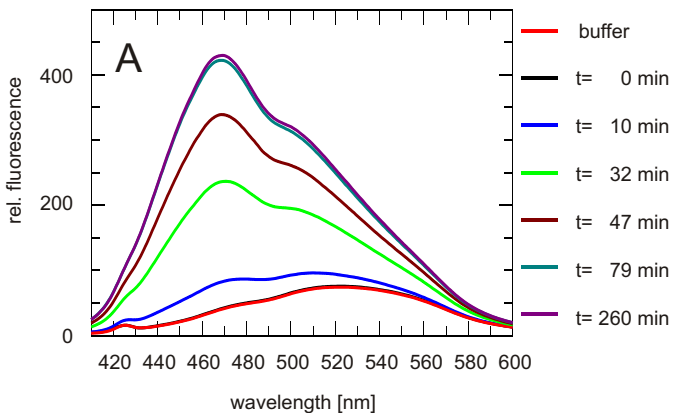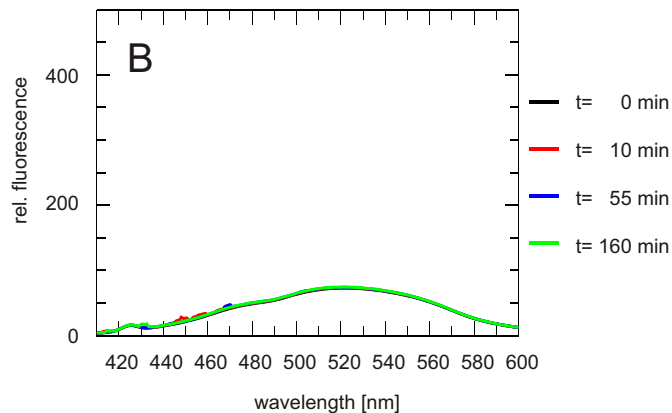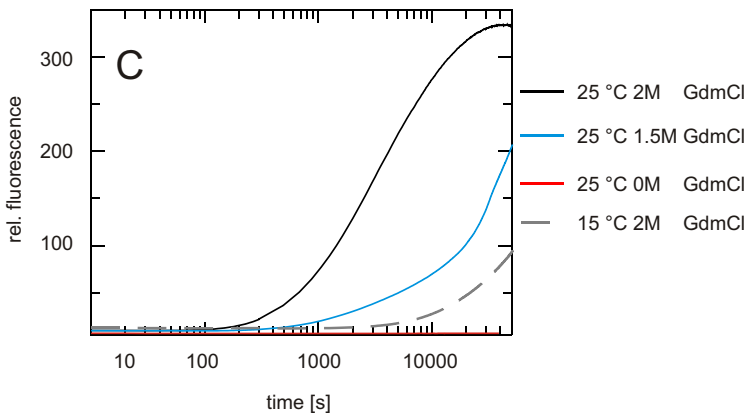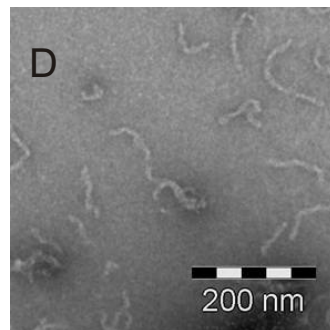

Supplement: pnas_0710657105_5.pdf [file pnas_0710657105_5.pdf]
